# Supplementary material for: The Influence of Public Health Faculty on College and University Plans During the COVID-19 Pandemic
Source: Front Public Health. 2022 Jan 14;9:745232. doi: 10.3389/fpubh.2021.745232 (PMC8795676; doi:10.3389/fpubh.2021.745232)
Supplement: Supplementary file 1 [file Data_Sheet_1.docx]

# Appendix and Supplemental Materials

Equation A1. Two-level Regression

Level 1:

Level 2

Level 2

where *i* and *j* are index numbers that represent the *ith* college/university within each *jth* state

*k* is an index number that represents the threshold (cut point) the divides the ordinal scale into two (in total, five thresholds are used for the 6-level modality restriction scale: (1) Levels 2-6 vs. 1; (2) Levels 3-6 vs. 1-2; (3) Levels 4-6 vs. 1-3; (4) Levels 5-6 vs. 1-4; and (5) Level 6 vs. 1-5)

represents the intercept for the model for each *jth* state, which includes both a fixed component (reported as the fixed intercept(s) in each model) and a component that varies by state (which is constrained to have an overall mean of 0; the variance is reported in the model results)

through represent the fixed slopes for the CEPH accreditation, enrollment, COVID-19 rate, and AAUP variables, respectively

represents the slope for the Governor’s Party variable, which includes both a fixed component (reported as the fixed slope in each model) and a component that varies by state (which is constrained to have an overall mean of 0; the variance is reported in the model results)
